# Supplementary material
Source: PubMed Central journal article supplement (PMC3754029)
Supplement: JVI.00573-13_zjv999097941so1.pdf [file JVI.00573-13_zjv999097941so1.pdf]

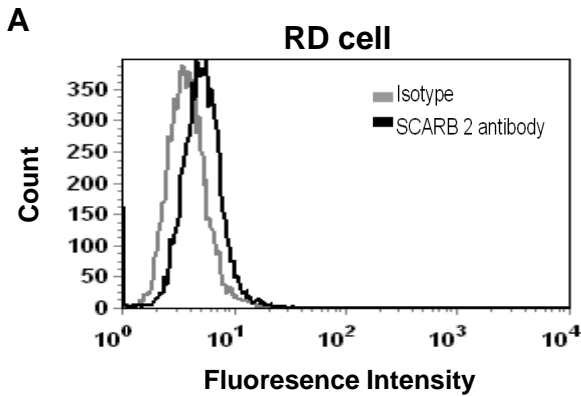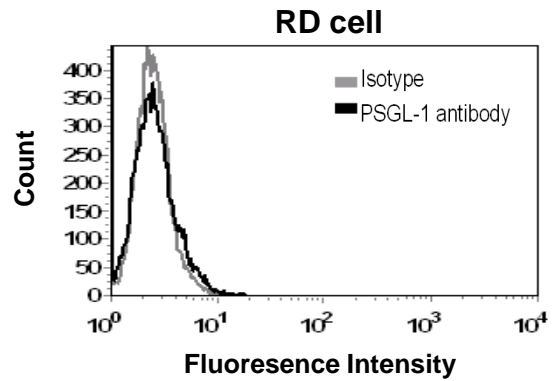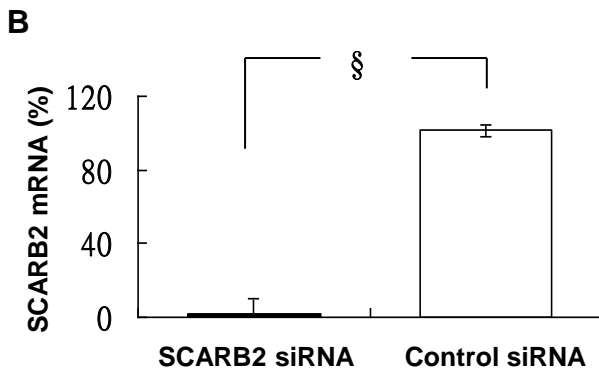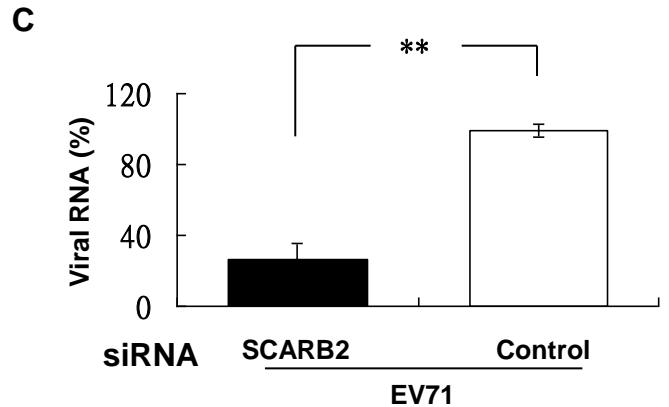

**Figure S1. SCARB2-specific siRNA resists EV71 infection in RD cells.** (A) The RD cells were incubated with biotinylated anti-SCARB2 antiserum (left panel; black curve) or anti-PSGL-1 (right panel; black curve), or their respective isotype IgG (gray curve) prior stained with FITC-conjugated avidin or Alexa-fluor 488-conjugated anti-mouse antibody, respectively. Stained cells were suspended in 1xPBS and analyzed by flow cytometry as described in the Materials and Methods. (B) The RD cells were transfected with 50 pmol SCARB2 siRNA and then incubated for 48 h. Total RNA were prepared to measure SCARB2 mRNA using real-time RT-PCR. (C) Following infection of EV71 (MOI=1), siRNA-treated cells were cultured for 24 h before lysis and RNA extraction. Real-time RT-PCR to measure viral RNA expression as described previously was performed. The mean relative expression of SCARB2 and viral RNA compared to the control siRNA-treated cells was calculated. Data were obtained from 3 independent experiments.
